# Supplementary material for: Patterns of response with talimogene laherparepvec in combination with ipilimumab or ipilimumab alone in metastatic unresectable melanoma
Source: PubMed Central journal article supplement (PMC6738060; doi:10.1038/s41416-019-0530-6), 2019-07-29

## **Supplemental Material**

## **Supplemental Methods**

### **Patients and Study Design**

In the combination arm, T-VEC was injected intralesionally on day 1 of week 1 ( $10^6$  plaque-forming units [PFU]/mL), then on day 1 of week 4 and every 2 weeks thereafter ( $10^8$  PFU/mL); ipilimumab (3 mg/kg) was administered intravenously every 3 weeks beginning day 1 of week 6 for up to four infusions.<sup>2</sup> In the ipilimumab arm, ipilimumab (3 mg/kg) was administered intravenously every 3 weeks beginning day 1 of week 1 for up to four infusions.<sup>2</sup> T-VEC treatment continued until patients had a CR, all injectable tumors had disappeared, confirmed disease progression per modified irRC was obtained, or patient intolerance.<sup>2</sup> Ipilimumab treatment continued for four infusions until confirmed disease progression per irRC or unacceptable ipilimumab-related toxicity.<sup>2</sup>

### **Assessments**

Tumor assessments were made via measurement of cutaneous, subcutaneous, or nodal tumors with calipers or via radiographic imaging of the chest, abdomen, and pelvis performed by computed tomography, positron emission tomography/computed tomography, or magnetic resonance imaging. In the exploratory analysis, the data-derived disease progression was defined as an increase from the nadir in tumor burden  $\geq 25\%$  in the existing lesion burden or after adding in the occurrence of new measurable lesions; the occurrence of new lesions was not necessarily labeled as disease progression as long as the tumor burden threshold was not crossed. Tumor burden in this analysis was measured as the sum of the products of the two largest of perpendicular diameters of index lesions plus new, measurable lesions (up to 5 new cutaneous lesions and 10 visceral lesions, maximum 5 new lesions per organ).

## Supplemental Results

### Patterns of Response

Examples of patient responses are shown in **Figure S4**. Patient A, a healthy 75-year-old man with a history of cutaneous melanoma of the right shoulder, was diagnosed with recurrent, *BRAF* wild-type, subdermal metastasis of the right deltoid. Three months into receiving talimogene laherparepvec plus ipilimumab therapy, the size of the deltoid tumor had significantly decreased, and by 18 months into the treatment the palpable tumor was completely gone and only skin discoloration remained. One year later, the patient remained in remission. Patient B was 67 years old with stage IIIC melanoma of the left thigh and calf. After 24 weeks of treatment with talimogene laherparepvec plus ipilimumab the patient achieved a partial response, and continued to have improvement after 130 weeks of therapy.

**Table S1. Demographics and Baseline Clinical Characteristics of Patients with an Objective Response**

| <b>Characteristic, n (%)</b>     | <b>T-VEC<br/>Plus Ipilimumab<br/>(n=38)</b> | <b>Ipilimumab<br/>(n=18)</b> | <b>Overall<br/>(n=56)</b> |
|----------------------------------|---------------------------------------------|------------------------------|---------------------------|
| Sex                              |                                             |                              |                           |
| Female                           | 16 (42)                                     | 7 (39)                       | 23 (41)                   |
| Male                             | 22 (58)                                     | 11 (61)                      | 33 (59)                   |
| Age, median (range), years       | 65 (30–93)                                  | 57 (23–82)                   | 62 (23–93)                |
| Race                             |                                             |                              |                           |
| White                            | 38 (100)                                    | 17 (94)                      | 55 (98)                   |
| American Indian or Alaska native | 0                                           | 1 (6)                        | 1 (2)                     |
| ECOG performance status          |                                             |                              |                           |
| 0                                | 29 (76)                                     | 14 (78)                      | 43 (77)                   |
| 1                                | 9 (24)                                      | 4 (22)                       | 13 (23)                   |
| Disease substage                 |                                             |                              |                           |
| IIIB                             | 3 (8)                                       | 1 (6)                        | 4 (7)                     |
| IIIC                             | 13 (34)                                     | 8 (44)                       | 21 (38)                   |
| IVM1a                            | 6 (16)                                      | 2 (11)                       | 8 (14)                    |
| IVM1b                            | 10 (26)                                     | 3 (17)                       | 13 (23)                   |
| IVM1c                            | 6 (16)                                      | 4 (22)                       | 10 (18)                   |
| <i>BRAF</i> status               |                                             |                              |                           |
| Mutant                           | 12 (32)                                     | 11 (61)                      | 23 (41)                   |
| Wild-type                        | 26 (68)                                     | 6 (33)                       | 32 (57)                   |
| Missing/unknown                  | 0                                           | 1 (6)                        | 1 (2)                     |
| Baseline HSV-1 status*           |                                             |                              |                           |
| Negative                         | 11 (29)                                     | 6 (33)                       | 17 (30)                   |
| Positive                         | 22 (58)                                     | 5 (28)                       | 27 (48)                   |

| Characteristic, n (%)                                                  | T-VEC                     |                      | Overall<br>(n=56) |
|------------------------------------------------------------------------|---------------------------|----------------------|-------------------|
|                                                                        | Plus Ipilimumab<br>(n=38) | Ipilimumab<br>(n=18) |                   |
| Unknown                                                                | 5 (13)                    | 7 (39)               | 12 (21)           |
| Previous surgery                                                       | 37 (97)                   | 18 (100)             | 55 (98)           |
| Previous anticancer therapy                                            | 7 (18)                    | 7 (39)               | 14 (25)           |
| Previous ipilimumab therapy                                            | 0                         | 0                    | 0                 |
| Baseline LDH                                                           |                           |                      |                   |
| ≤1× ULN                                                                | 35 (92)                   | 13 (72)              | 48 (86)           |
| >1–2× ULN                                                              | 1 (3)                     | 4 (22)               | 5 (9)             |
| >2× ULN                                                                | 1 (3)                     | 1 (6)                | 2 (4)             |
| Unknown                                                                | 1 (3)                     | 0                    | 1 (2)             |
| Visceral disease at baseline                                           | 14 (37)                   | 6 (33)               | 20 (36)           |
| SPD <sup>†</sup> of all index lesions, median (range), mm <sup>2</sup> | 761 (49–6636)             | 272 (50–5139)        | 574 (49–6636)     |

Data are shown as n (%) unless otherwise stated.

ECOG=Eastern Cooperative Oncology Group; HSV=herpes simplex virus; LDH=lactate dehydrogenase; ULN=upper limit of the normal range; T-VEC=talimogene laherparepvec.

\*HSV-1 immunoglobulin G antibody reference ranges: negative, < 0.91; positive, > 1.09.

<sup>†</sup>SPD refers to the sum of the products of the two largest perpendicular diameters.

**Table S2. Patient Incidence of Pseudoprogession**

---

| <b>Characteristic, n (%)</b>                    | <b>T-VEC Plus<br/>Ipilimumab<br/>(n=38)</b> | <b>Ipilimumab<br/>(n=18)</b> |
|-------------------------------------------------|---------------------------------------------|------------------------------|
| Pseudoprogession in existing lesions            | 5 (13)                                      | 1 (6)                        |
| Pseudoprogession with new lesions               | 2 (5)                                       | 0                            |
| No pseudoprogession (responded within 6 months) | 30 (79)                                     | 16 (89)                      |
| No pseudoprogession (responded after 6 months)  | 1 (3)                                       | 1 (6)                        |

---

T-VEC=talimogene laherparepvec.

**Table S3. Listing of Study Sites and Institutional Review Boards/ Ethics Committees**

| Site Name                                                          | IRB/IEC Name                                                                          |
|--------------------------------------------------------------------|---------------------------------------------------------------------------------------|
| <b>United States</b>                                               |                                                                                       |
| Allina Health System dba Virginia Piper Cancer Institute           | Quorum Review Inc.                                                                    |
| Baptist MD Anderson Cancer Center                                  | Baptist Medical Center Institutional Review Board                                     |
| Beverly Hills Cancer Center                                        | Western Institutional Review Board                                                    |
| Columbia University Medical Center                                 | Columbia University Medical Center Institutional Review Board                         |
| Gabrail Cancer Center, LLC                                         | Western Institutional Review Board                                                    |
| Hematology Oncology Associates                                     | Western Institutional Review Board                                                    |
| Icahn School of Medicine at Mount Sinai                            | Program for the Protection of Human Subjects, Icahn School of Medicine at Mount Sinai |
| Indiana University Melvin and Bren Simon Cancer Center             | Indiana University Institutional Review Board                                         |
| Lakeland Regional Cancer Center                                    | Lakeland Regional Medical Center IRB                                                  |
| Mayo Clinic                                                        | Mayo Clinic Institutional Review Board                                                |
| Medical University of South Carolina                               | Medical University of South Carolina, Office of Research Integrity IRB                |
| Morristown Medical Center                                          | Atlantic Health System IRB                                                            |
| Mount Sinai Comprehensive Cancer Center                            | Mount Sinai Medical Center                                                            |
| Rush University Medical Center                                     | Rush University Medical Center IRB                                                    |
| Rutgers Cancer Institute of New Jersey                             | Western Institutional Review Board                                                    |
| Saint Louis University Hospital                                    | Saint Louis University IRB                                                            |
| San Francisco Oncology Associates Medical Group Inc                | Western Institutional Review Board                                                    |
| Sutter Pacific Medical Foundation                                  | Western Institutional Review Board                                                    |
| The Angeles Clinic and Research Institute, West Los Angeles Office | Western Institutional Review Board                                                    |
| The Medical College of Wisconsin                                   | Medical College of Wisconsin Froedtert Hospital Institutional Review Board            |
| University of Arizona Cancer Center                                | Western Institutional Review Board                                                    |
| University of California at Los Angeles Medical Center             | University of California at Los Angeles Office of Human Research Protection Program   |
| University of Cincinnati Medical Center                            | University of Cincinnati IRB                                                          |
| University of Colorado Cancer Center                               | Colorado Multiple Institutional Review Board                                          |

University of Iowa Hospital and Clinics  
University of Louisville James Graham Brown Cancer Center

University of North Carolina at Chapel Hill

University of Southern California, Norris Comprehensive  
Cancer Center  
University of Texas MD Anderson Cancer Center

University of Utah Huntsman Cancer Institute  
Vanderbilt University Medical Center  
Virginia Commonwealth University Massey Cancer Center

University of Iowa IRB  
University of Louisville IRB Human Subjects Protection Program  
Office

University of North Carolina at Chapel Hill, Office of Human  
Research Ethics

University of Southern California, Health Sciences Institutional  
Review Board

University of Texas MD Anderson Cancer Center Institutional  
Review Board

University of Utah IRB  
Vanderbilt University IRB  
Western Institutional Review Board

---

**France**

Centre Hospitalier Régional Universitaire de Lille - Hôpital  
Claude Huriez

Centre Hospitalier Universitaire de Bordeaux - Hôpital Saint  
André

Centre Hospitalier Universitaire de Grenoble - Hopital Nord  
Michallon

Centre Hospitalier Universitaire de Nantes, Hôpital Hôtel Dieu  
Hopital Saint Louis

Comité de Protection des Personnes Nord Ouest IV

---

**Germany**

Universitätsklinikum Schleswig-Holstein

Universitätsklinikum Tübingen

Universitätsmedizin Göttingen - Georg-August-Universität

Ethik-Kommission der Medizinischen Fakultät der Christian-  
Albrechts-Universität zu Kiel

Ethikkommission der Medizinischen Fakultät am  
Universitätsklinikum

Ethikkommission der Medizinischen Fakultät am  
Universitätsklinikum

---

IRB/IEC=Institutional Review Boards/Ethics Committees.



**Figure S1. Study schema for the phase 2, randomized, open-label study.** CNS=central nervous system; ECOG=Eastern Cooperative Oncology Group; irRC=immune-related response criteria; IV=intravenous; ORR=objective response rate; OS=overall survival; mets=metastases; PD-1=programmed death-1; PFS=progression-free survival; PFU=plaque-forming unit; Q2W=every 2 weeks; Q3W=every 3 weeks; Q12W=every 12 weeks; R=randomization. \*irRC described in Wolchok JD, et al. *Clin Cancer Res.* 2009;15(23):7412-7420. Reprinted with permission from Chesney J, et al. *J Clin Oncol.* 018;36(17):1658-1667.

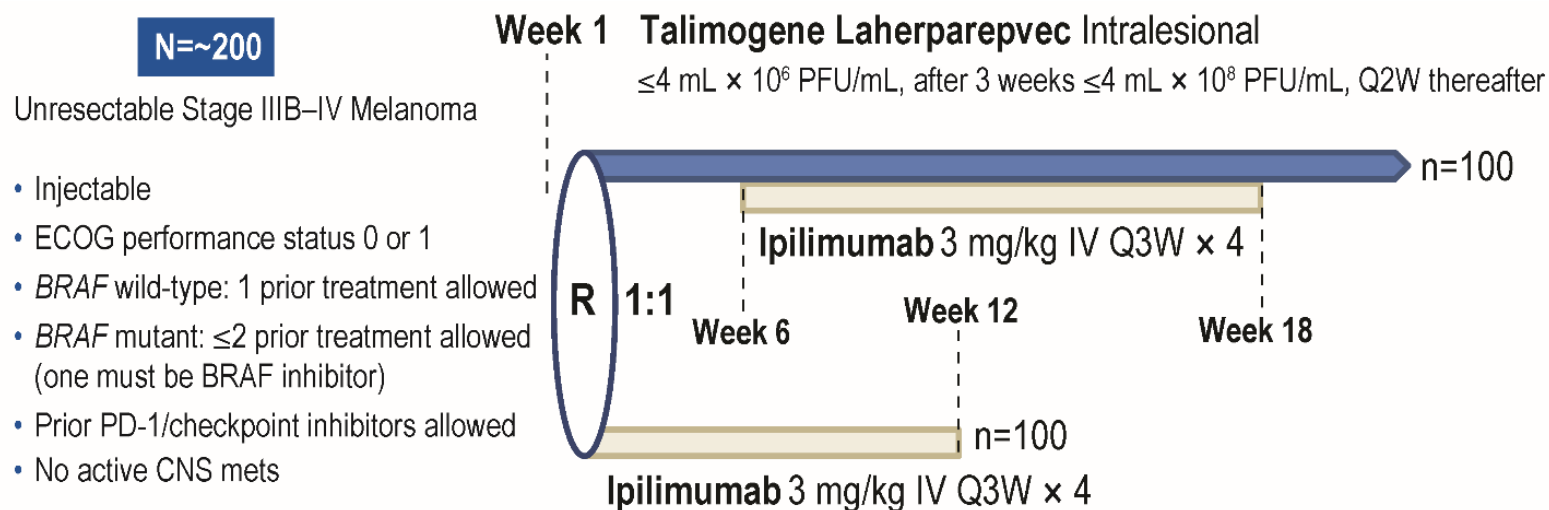

- Talimogene laherparepvec dosing until complete response, all injectable tumors disappeared, progressive disease per irRC, or intolerance, whichever comes first
- Tumor assessments at baseline and Q12W thereafter by irRC (requiring confirmation ≥28 days from the date first documented)\*
- Safety follow-up within 4 weeks after treatment ended; long term follow-up every 12 weeks after safety follow-up for 36 months

|                            |                                                                                                                             |
|----------------------------|-----------------------------------------------------------------------------------------------------------------------------|
| <b>Primary Endpoint</b>    | investigator-assessed ORR per modified irRC (90% power to detect 21% increase in ORR assuming 15% ORR for ipilimumab alone) |
| <b>Secondary Endpoints</b> | OS, PFS, time to response, duration of response, safety                                                                     |

**Figure S2. Patterns of response after treatment in patients with pseudoprogression. (A)** Patients treated with T-VEC plus ipilimumab who had pseudoprogression associated with an increase in existing lesions\*; **(B)** patients treated with ipilimumab only who had pseudoprogression associated with an increase in existing lesions\*; **(C)** patients treated with T-VEC plus ipilimumab who had pseudoprogression associated with the development of new lesions.

\*Pseudoprogression due to increase in existing lesions meant tumor burden increase in existing lesions exceeded the threshold for progressive disease and does not imply that there were no new lesions.

Figure S2.

**A. Pseudoprogession associated with an increase in existing lesions**

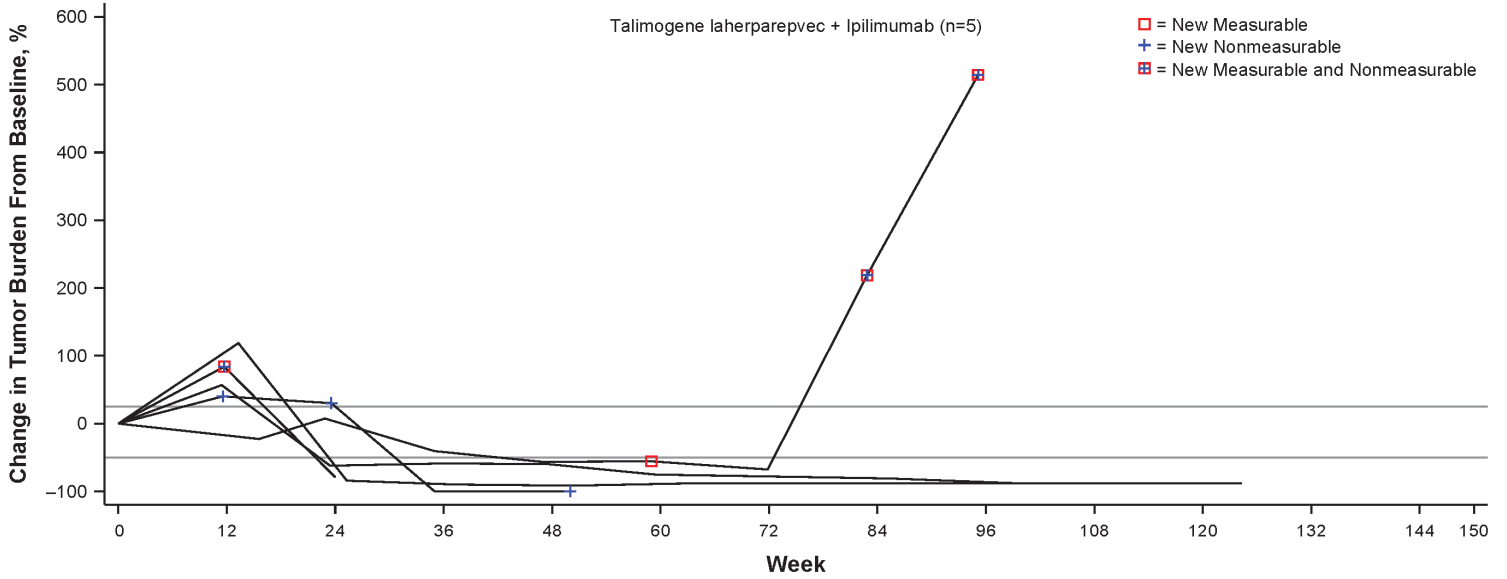

**B. Pseudoprogession associated with an increase in existing lesions**

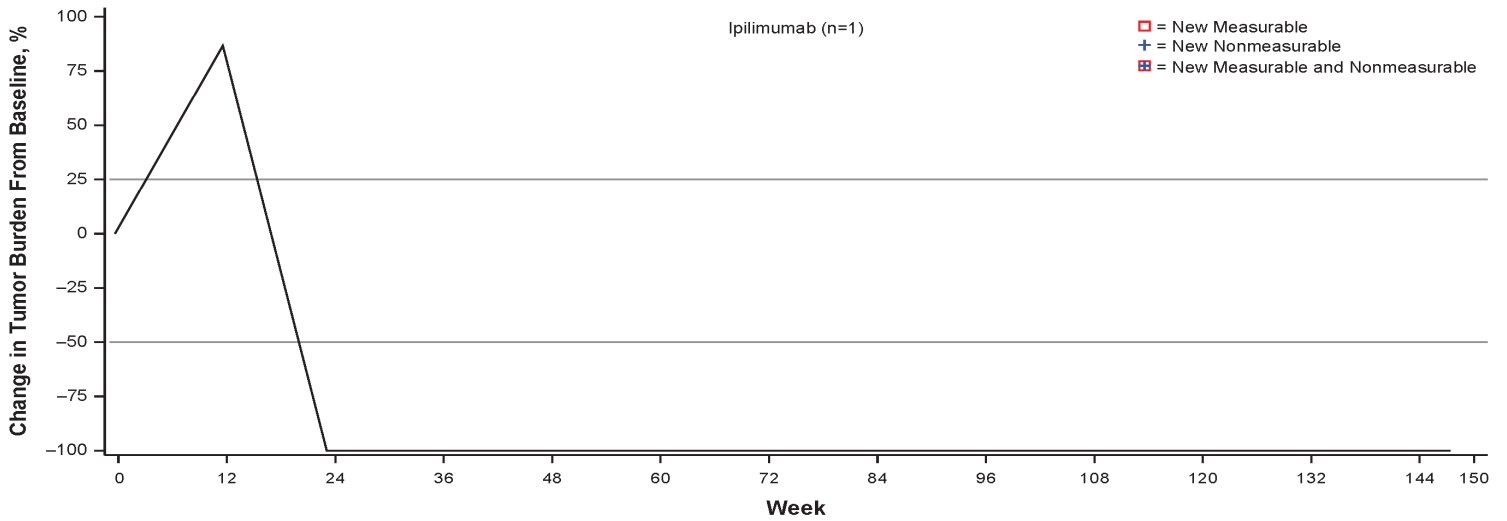

**C. Pseudoprogession associated with the development of new lesions**

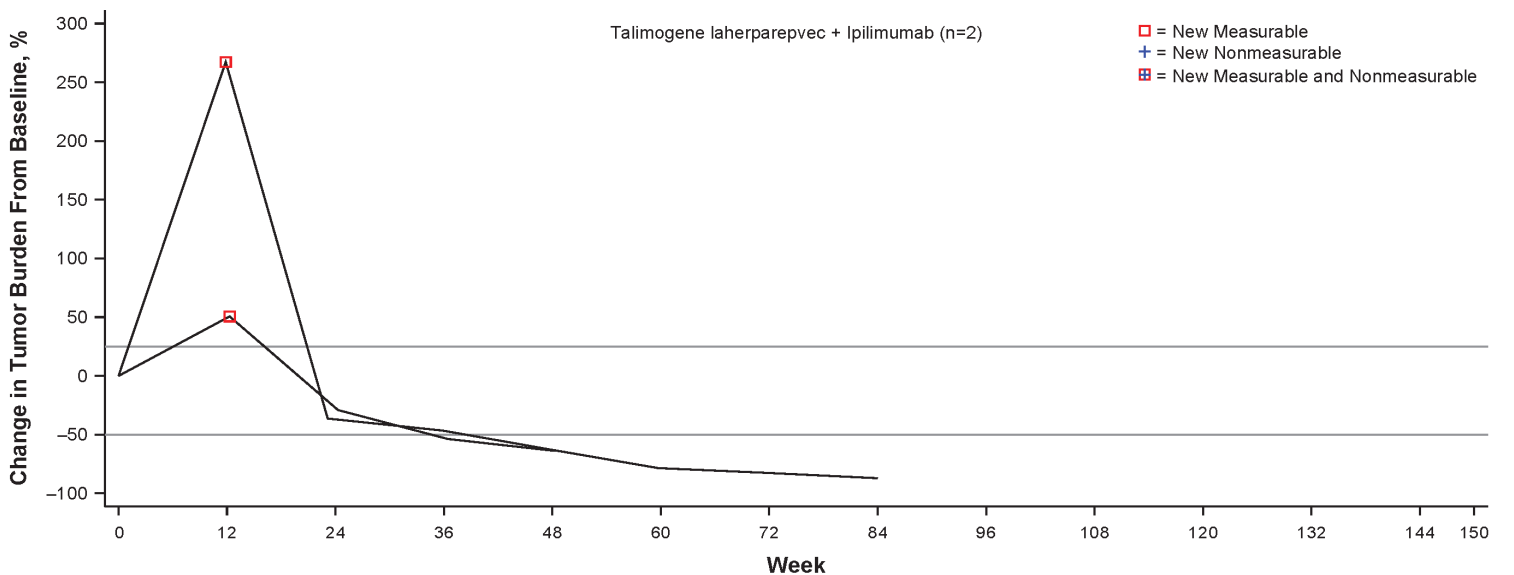

**Figure S3. Patterns of response in patients without pseudoprogression.** (A) Patients treated with T-VEC plus ipilimumab without pseudoprogression who responded within 6 months following start of treatment; (B) patients treated with ipilimumab only without pseudoprogression who responded within 6 months following start of treatment; (C) patients treated with T-VEC plus ipilimumab without pseudoprogression who responded after 6 months following start of treatment; (D) patients treated with ipilimumab only without pseudoprogression who responded after 6 months following start of treatment.

Figure S3.

**A. Patients without pseudoprogression who responded within 6 months following start of treatment**

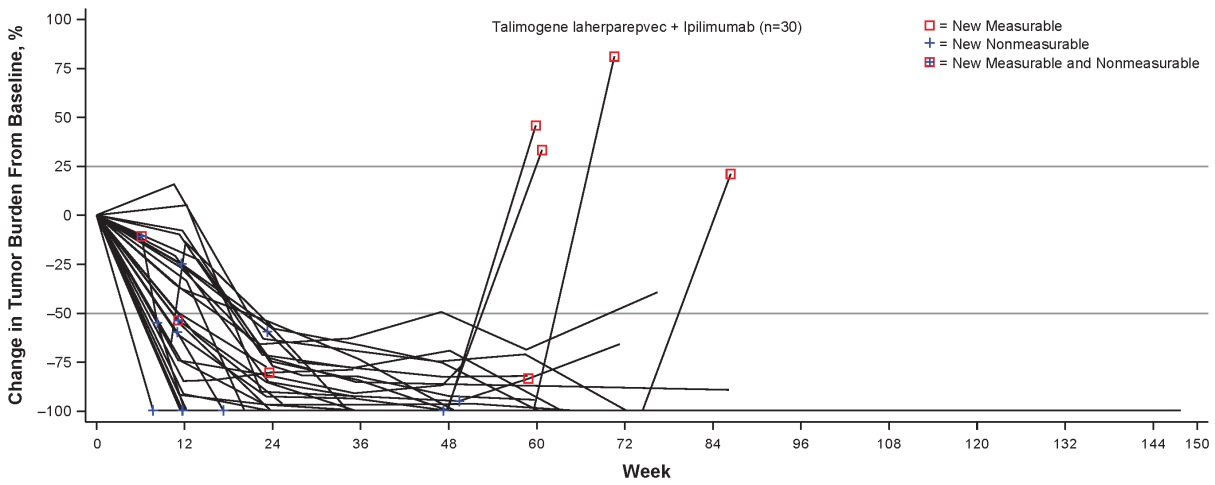

**B. Patients without pseudoprogression who responded within 6 months following start of treatment**

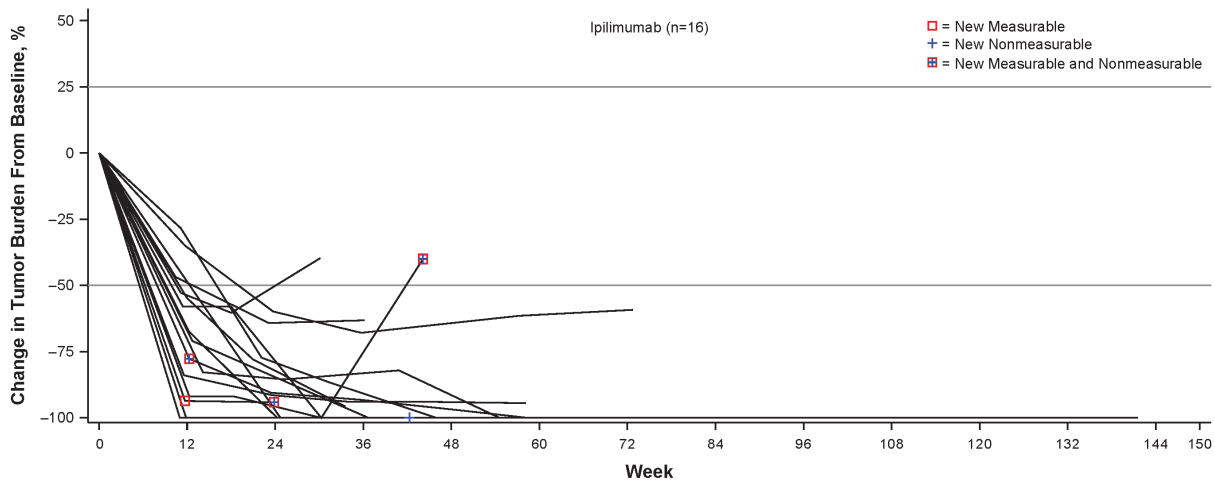

**C. Patients without pseudoprogression who responded after 6 months following start of treatment**

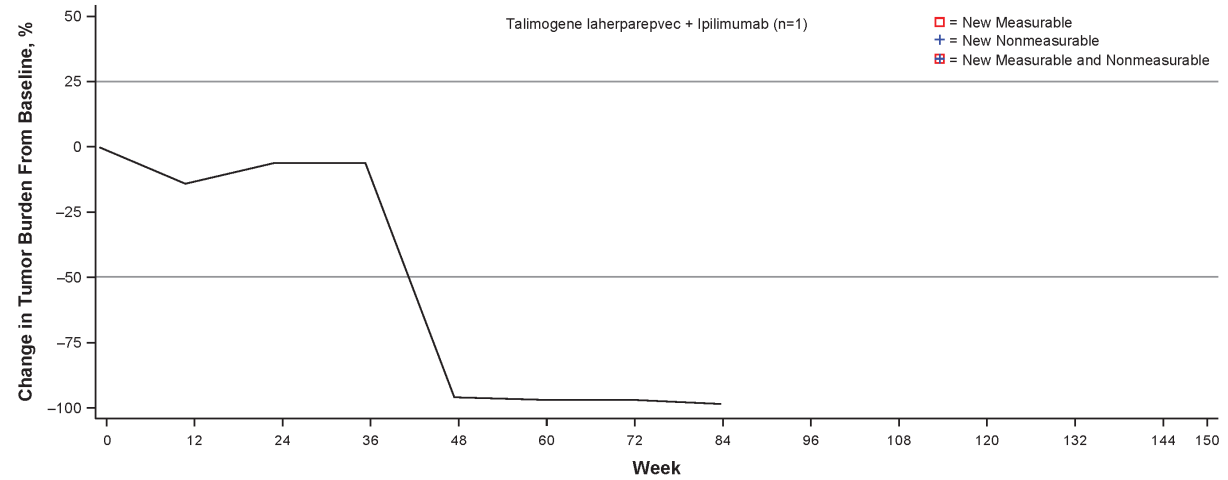

**D. Patients without pseudoprogression who responded after 6 months following start of treatment**

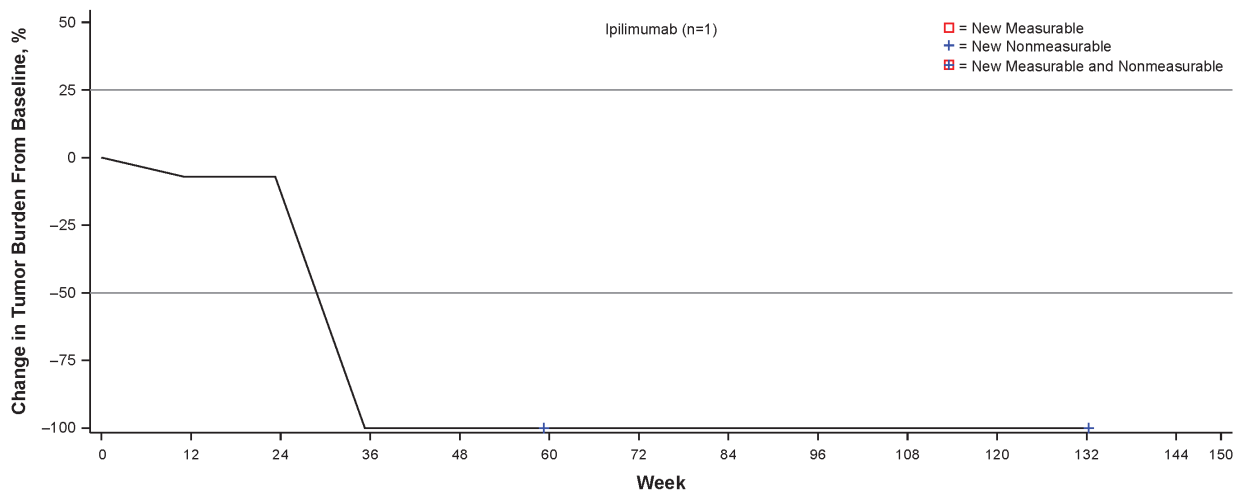

**Figure S4. Photographs of patients treated with talimogene laherparepvec plus ipilimumab.**

**Patient A:** A healthy 75-year-old man with a history of cutaneous melanoma of the right shoulder was diagnosed with recurrent, subdermal metastasis of the right deltoid, *BRAF* wild-type. Positron emission tomography (PET) scan showed multiple areas of fludeoxyglucose (FDG) uptake in the spleen consistent with metastatic disease and multiple pulmonary nodules. His baseline deltoid lesion is shown (1). Three months into the protocol, the size of the deltoid tumor was significantly decreased, and its vascular supply was diminished (2). Six and 10 months into the protocol, there was further decrease in the size of the tumor (3, 4). Seventeen months into the protocol, the patient was treated with the last dose of talimogene laherparepvec. Eighteen months into the protocol, the palpable tumor was gone; only white discoloration of the skin remained (5). PET scan showed no FDG uptake in the deltoid tumor, stable pulmonary nodules, and improved splenic metastasis. One year later, the patient remains in remission.

**Patient B:** A 67-year-old patient with stage IIIC melanoma of the left thigh and calf. The patient had had a wide local excision and had been treated with adjuvant radiation therapy that was completed in January 2013. Recurrence of melanoma was noted in May 2013. The patient was subsequently enrolled in the trial. The baseline lesion at enrollment is shown (1) before treatment with talimogene laherparepvec plus ipilimumab. The patient achieved a partial response after 24 weeks into the protocol, and the lesion is shown after 58 weeks into the protocol (August 2014; 2). Further improvement was seen after 130 weeks into the protocol (December 2015; 3).

Figure S4.

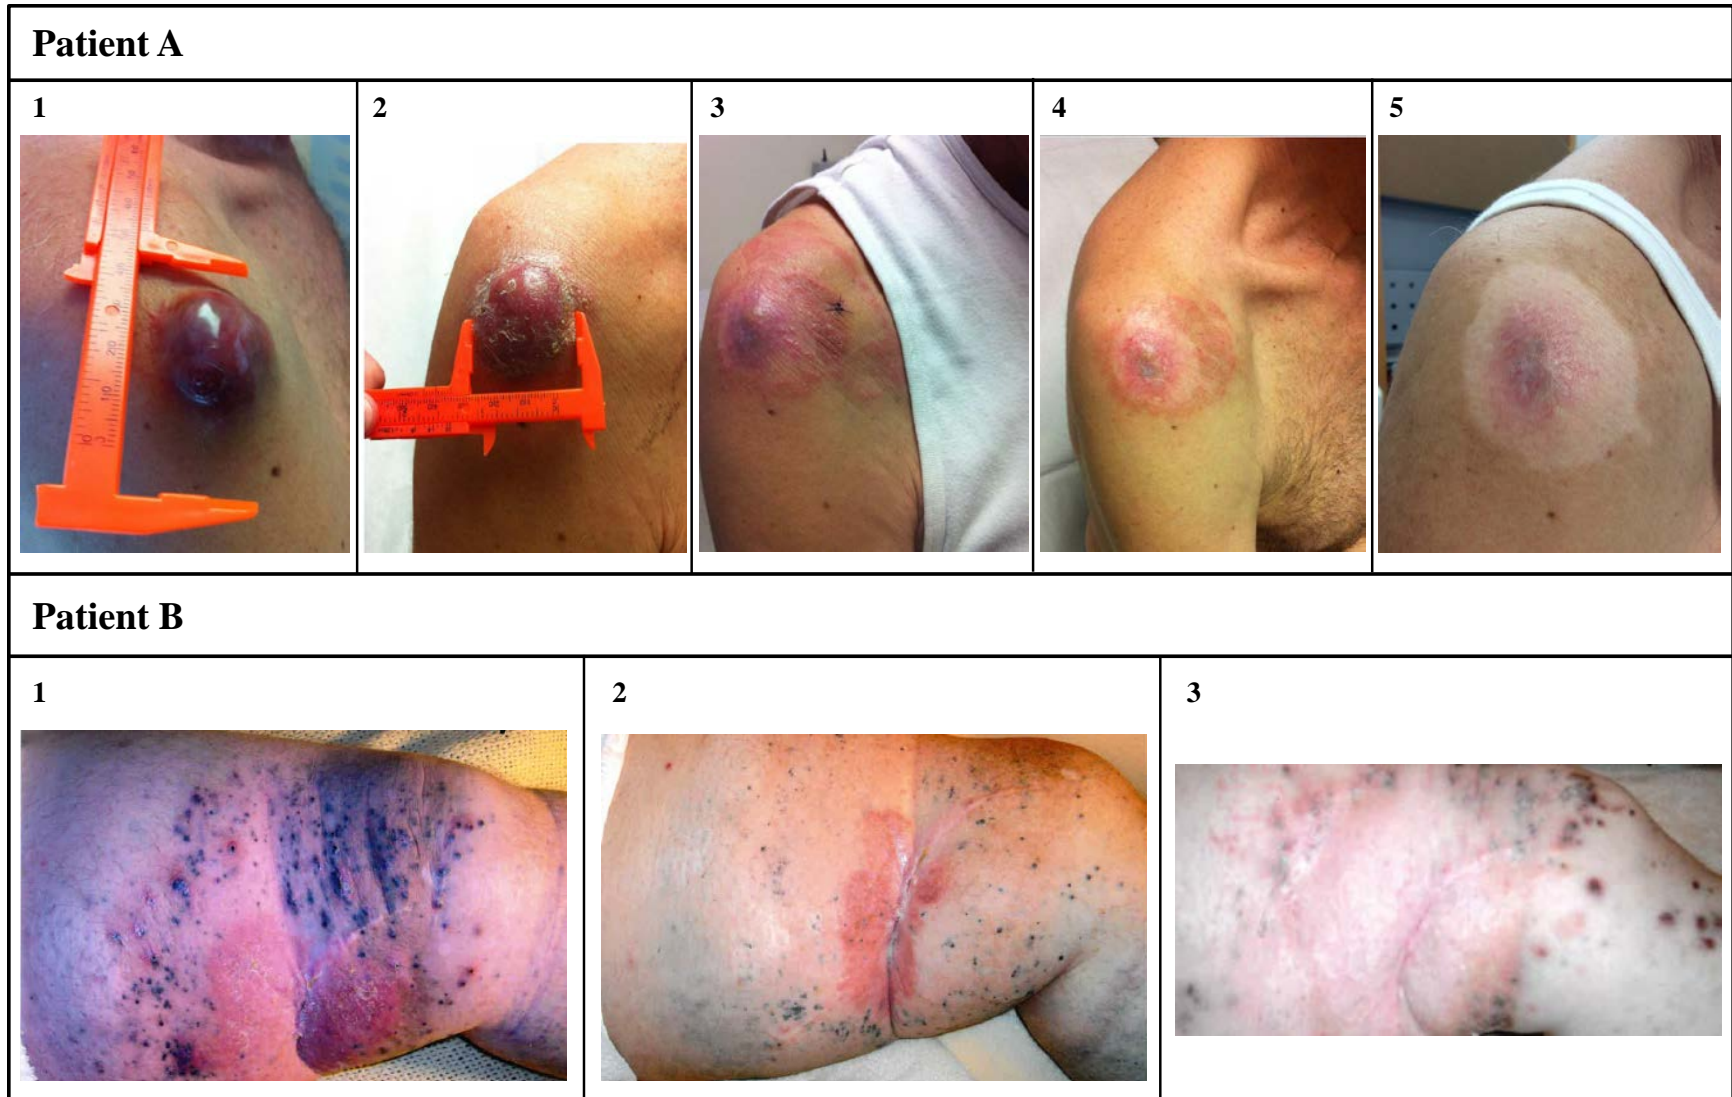

Supplement: 41416_2019_530_MOESM1_ESM.pdf [file 41416_2019_530_MOESM1_ESM.pdf]
